# Supplementary material
Source: PubMed Central journal article supplement (PMC7416765)
Supplement: suppl_cwz103.pdf [file suppl_cwz103.pdf]

Heparan sulfate inhibits transforming growth factor  $\beta$  signaling and functions *in cis* and *in trans* to regulate prostate stem/progenitor cell activities

**Sumit Rai<sup>1</sup>, Omar Awad Alsaidan<sup>2</sup>, Hua Yang<sup>3</sup>, Houjian Cai<sup>2\*</sup>, Lianchun Wang<sup>1,3\*</sup>**

<sup>1</sup> Complex Carbohydrate Research Center and Department of Biochemistry and Molecular Biology, University of Georgia, Athens, GA 30602, USA.

<sup>2</sup> Department of Pharmaceutical and Biomedical Sciences, College of Pharmacy, University of Georgia, Athens, GA 30602, USA

<sup>3</sup> Department of Molecular Pharmacology and Physiology, and Byrd Alzheimer's Institute, University of South Florida, Tampa, FL 33613, USA

Running title: *Heparan sulfate regulates prostate stem/progenitor cell functions*

To whom correspondence should be addressed: Lianchun Wang, MD, Department of Molecular Pharmacology and Physiology, and Byrd Alzheimer's Institute, University of South Florida, Tampa, FL 33613, USA. Office: 813/974-2910; E-mail: [lianchunw@health.usf.edu](mailto:lianchunw@health.usf.edu); or Houjian Cai, Ph.D., Department of Pharmaceutical and Biomedical Sciences, College of Pharmacy, University of Georgia, Athens, GA 30602, USA. Office: 706/542-1079; Fax: 706-542-5358; E-mail: [caihj@uga.edu](mailto:caihj@uga.edu).

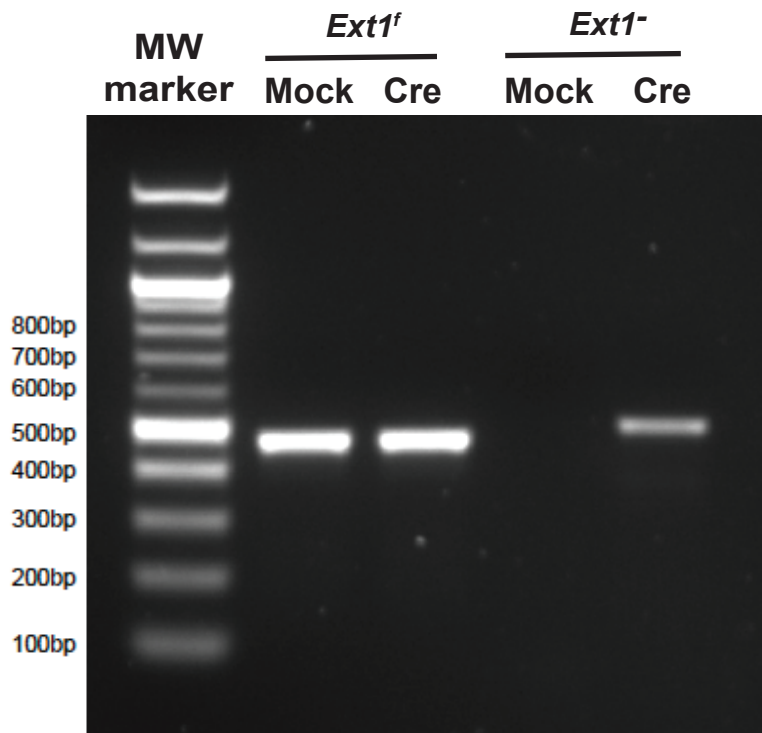

**Figure S1. Cre mediated excision of *Ext1* allele.** Genomic DNA isolated from primary spheres generated by mock- or Cre- lentivirus transduced *Ext1<sup>fl/fl</sup>* PrECs was subjected to PCR analysis to detect loxP flanked *Ext1* (*Ext1<sup>f</sup>* allele, 460 bp) and Cre-excised *Ext1* deletion (*Ext1<sup>-</sup>*, 500 bp) allele. Primary cultures are a mixed population of transduced and un-transduced spheres thus resulting in *Ext1<sup>fl/oxed</sup>* allele being detected in Cre-transduced PrECs.

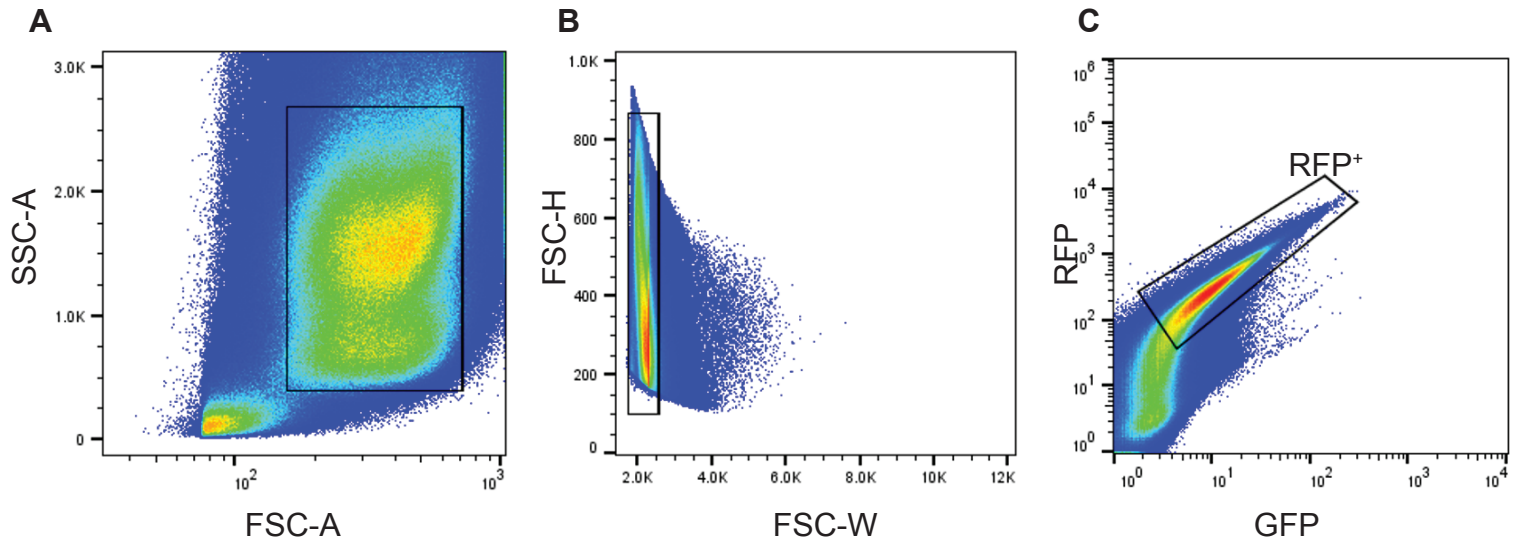

**Figure S2. Gating strategy to collect RFP-expressing PrECs from primary spheres.** PrECs transduced with control or Cre (with RFP marker) expressing lentivirus. Primary prostate spheres were dissociated and sorted. (A) Exclusion of cell debris. (B) Doublet discrimination to obtain a single cells suspension. (C) Identification of RFP-expressing PrECs.

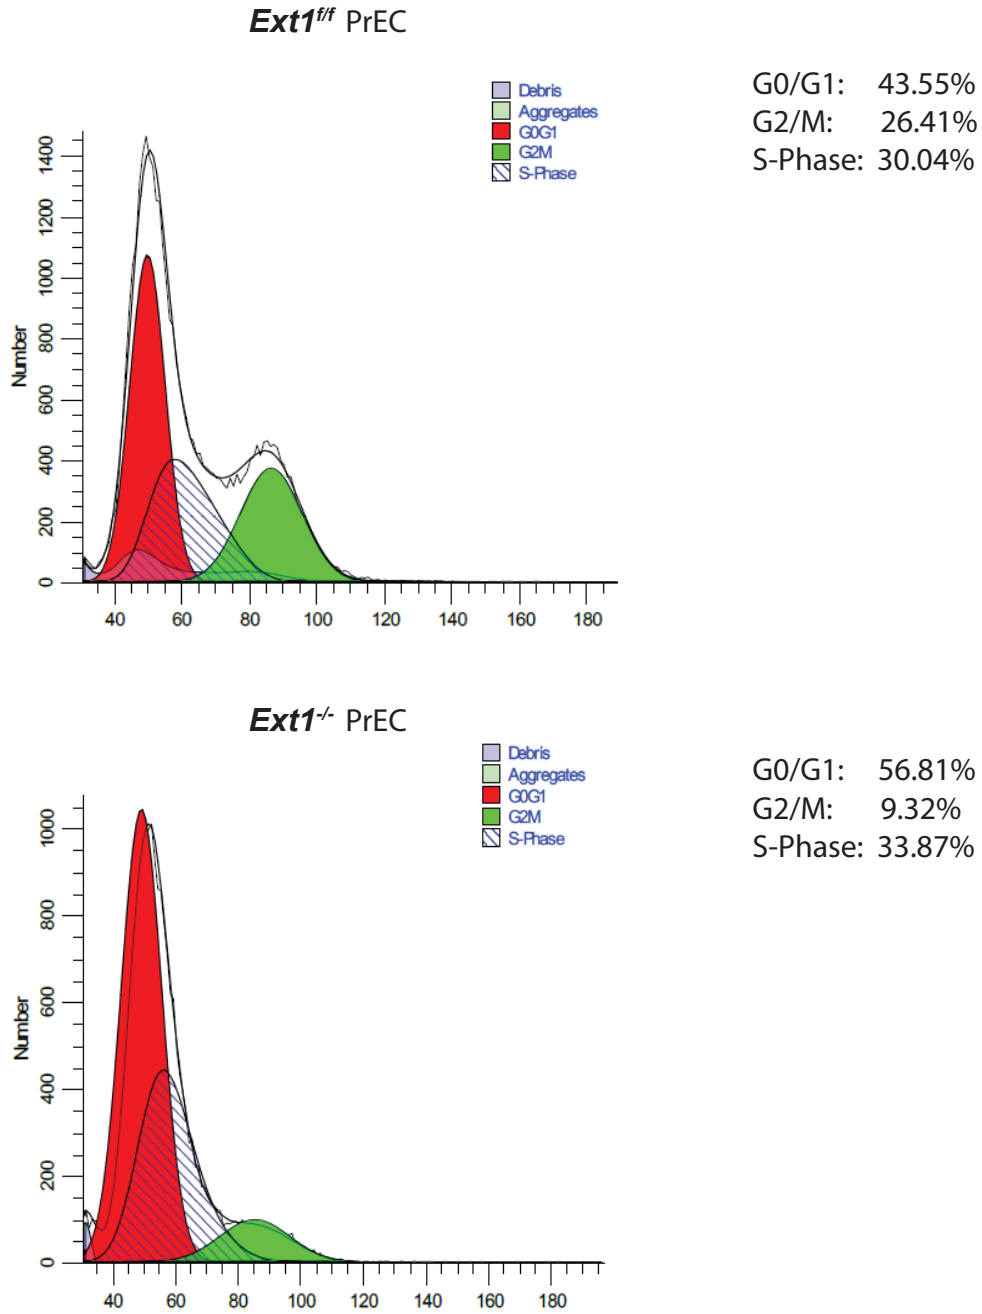

**Figure S3. Loss of HS expression arrests cell cycle progression.** Primary spheres infected with control or Cre expressing virus were dissociated, sorted and cultured in Matrigel for 16-20 hrs. Cell cycle analysis of *Ext1<sup>fl/fl</sup>* and *Ext1<sup>-/-</sup>* PrECs was performed and the data was analyzed using ModFit.

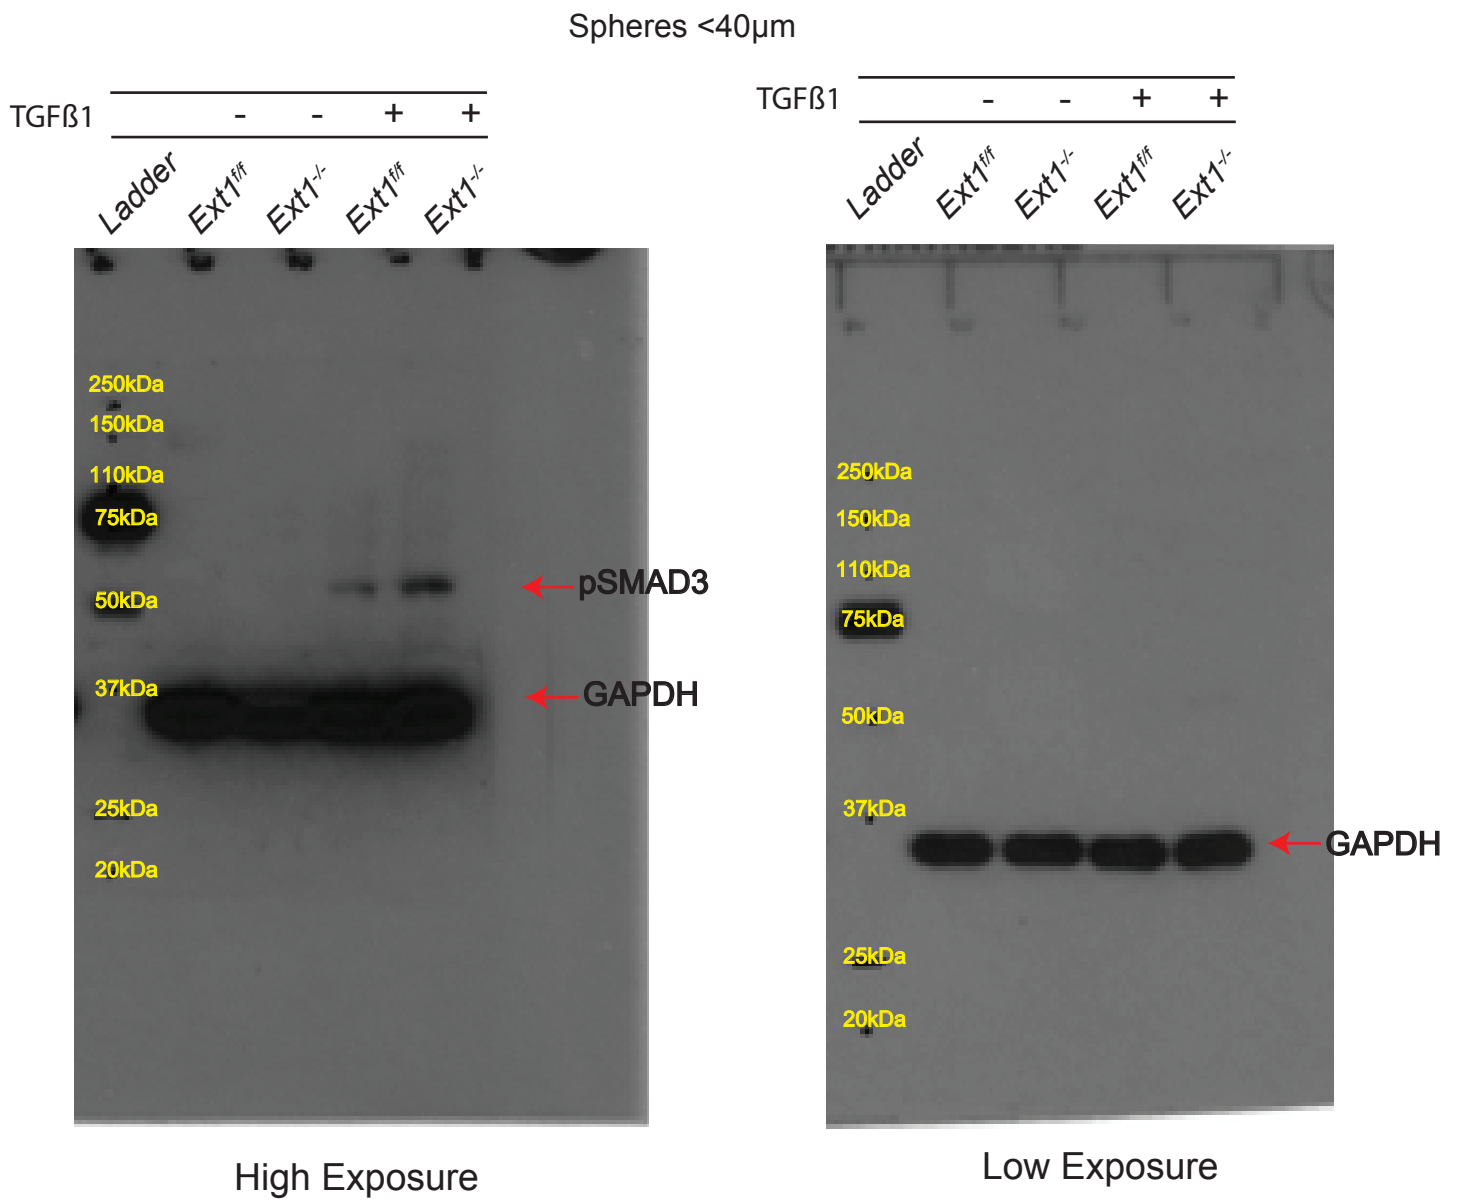

**Figure S4.** Loss of HS enhances TGF $\beta$  - Samd2/3 signaling in *Ext1<sup>-/-</sup>* PrECs. Western blot images for Figure 5E

**A**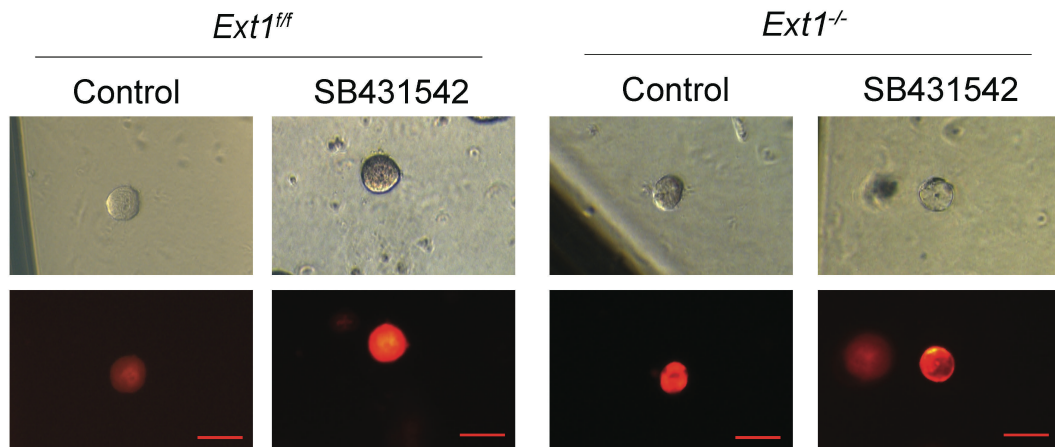**B**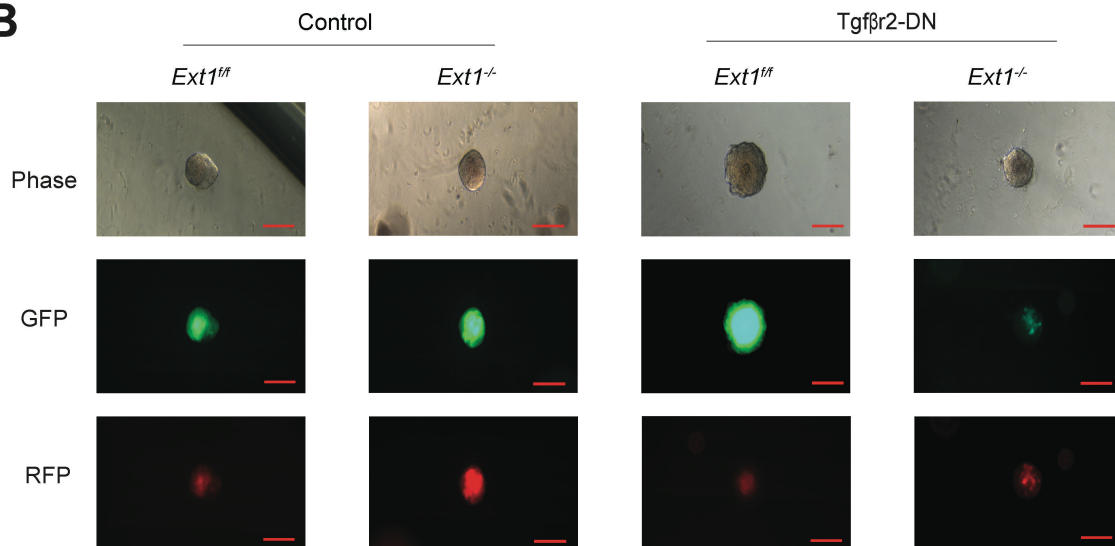

**Figure S5. Inhibition of TGF $\beta$  signaling restores sphere formation activity of *Ext1<sup>-/-</sup>* PrSCs.** The size of the secondary spheres formed from primary *Ext1<sup>-/-</sup>* PrECs was increased either with SB43154 treatment (**A**) or following overexpression of dominant negative form of TGF $\beta$ R2 (TGF $\beta$ R2-DN) (**B**). Scale = 100 $\mu$ m. Images shown are representative from three independent experiments.

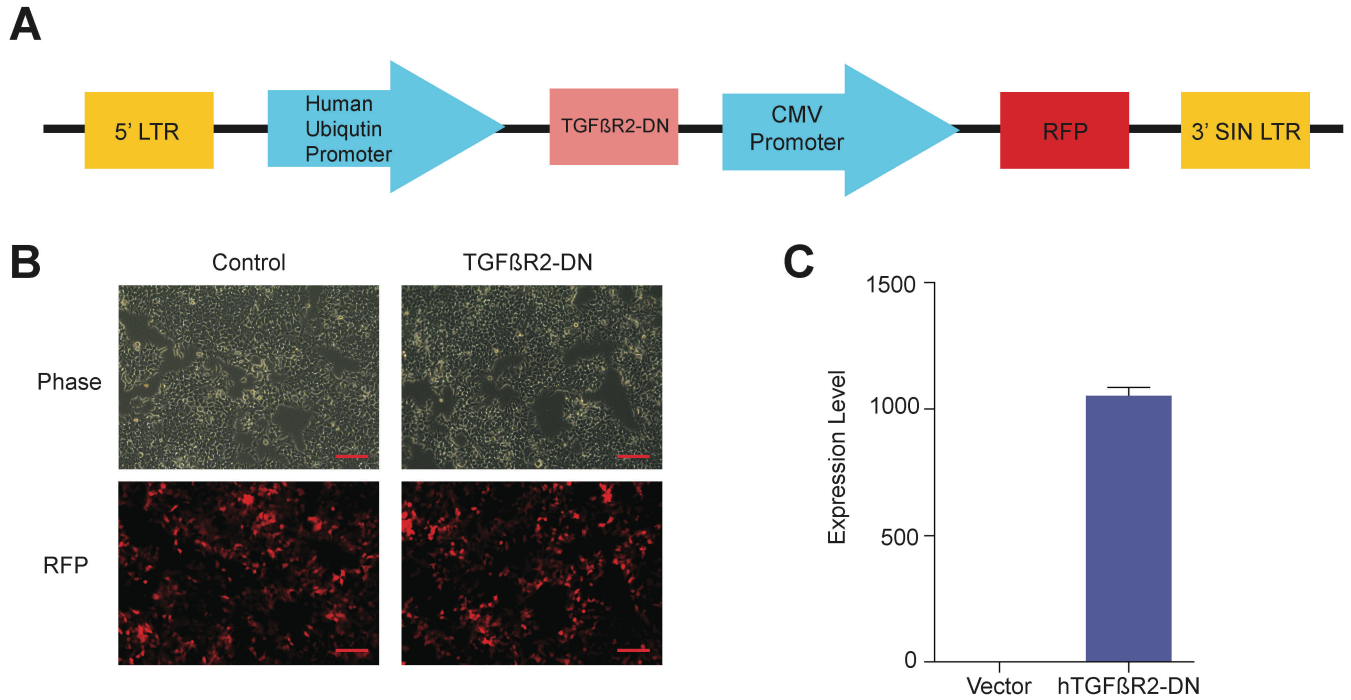

**Figure S6. Validation of TGFβR2-DN expression.** (A) Truncated TGFβR2 (TGFβR2-DN) was cloned into a lentiviral vector as described in the Supplemental Methods. Schematic representation of lentiviral construct expressing TGFβR2-DN (labeled with RFP). (B) 293T cells were transduced with control or TGFβR2-DN expressing virus by lentiviral infection. (C) The mRNA levels of human TGFβR2 was measured by RT-PCR. Fold Change normalized to Gapdh.

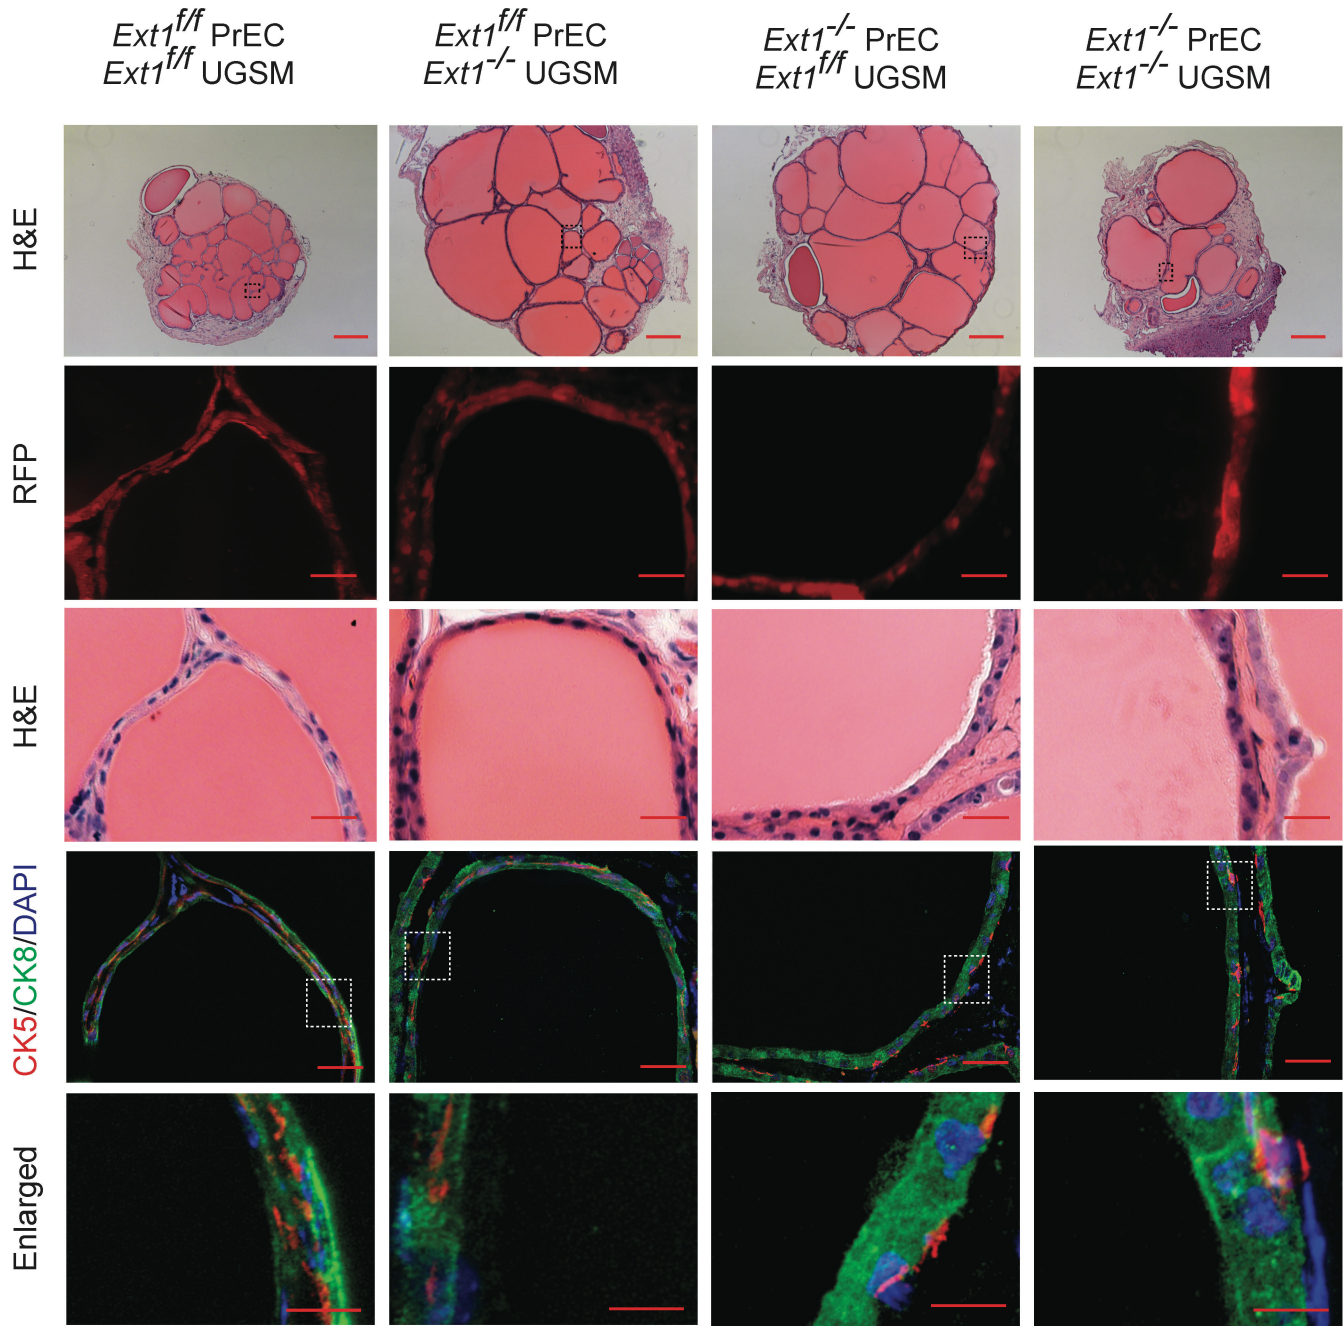

**figure S7. Histological and immuno-histochemical analyses of the regenerated grafts.** H&E staining of tissue section (scale bar=200 $\mu$ m). H&E and CK5/CK8 expression of an RFP expressing tubule (Scale bar = 25 $\mu$ m)



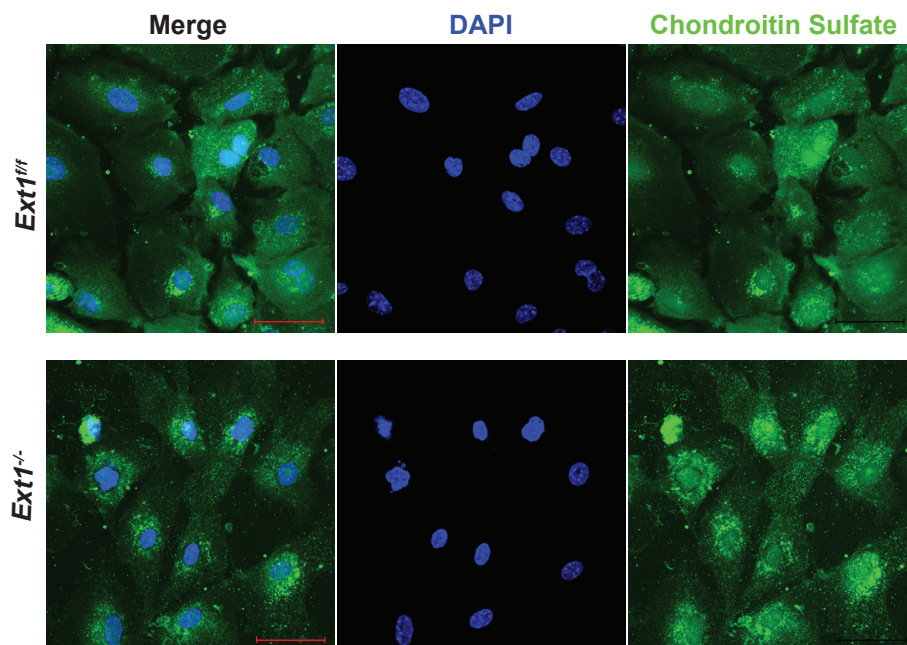

**Figure S8. Chondroitin sulfate expression on PrECs.** Immunofluorescence of *Ext1<sup>fl/fl</sup>* and *Ext1<sup>-/-</sup>* PrECs from primary prostate spheres were dissociated, cultured as a monolayer and stained for CS epitopes using CS-56 antibody. Scale = 50 $\mu$ m.

**Table SI**

Primers for mouse genotyping.

| Primer  | Sequence (5'-3')       | Amplicon Size                              | Comments                                               |
|---------|------------------------|--------------------------------------------|--------------------------------------------------------|
| Burn 51 | GGAGTGTGGATGAGTTGAAG   | 460bp : floxed allele<br>389bp : WT allele | Distinguishes between WT and floxed <i>Ext1</i> allele |
| Burn 52 | CAACACTTTCAGCTCCAGTC   |                                            |                                                        |
| Burn 51 | GGAGTGTGGATGAGTTGAAG   | 500bp                                      | Detects <i>Ext1</i> deletion band                      |
| Burn 29 | GAGAACAGGTACCCATGTTC   |                                            |                                                        |
| P021    | CTGAAGAATGGGACAGGCATTG | 393bp                                      | Detects the presence of Pb-Cre                         |
| C031    | CATCACTCGTTGCATCGACC   |                                            |                                                        |

**Table SII**

Primers for amplification of truncated TGF $\beta$ R2 from pCMV5 HA-TBR11 (delta Cyt) plasmid.

| Primer         | Sequence (5'-3')                    | Comments                                                  |
|----------------|-------------------------------------|-----------------------------------------------------------|
| Forward Primer | AAATCTAGAGCCACCATGGGTCTGGGGGCTGCTC  | TCTAGA - XbaI restriction site<br>GCCACC - Kozak Sequence |
| Reverse Primer | AAAAAGAATTCTCATGAACTCAGCTTCTGCTGCCG | GAATTC – EcoRI restriction site                           |

**Table SIII**

Primers for mouse qRT-PCR.

| Primer           | Sequence (5'-3')       | Amplicon Size |
|------------------|------------------------|---------------|
| Ext1 Forward     | TGGAGTCCTGCTTCGATTTTC  | 72bp          |
| Ext1 Reverse     | CTTCTGCTGCGGGTACAC     |               |
| p63 Forward      | ACAATGCCCAGACTCAATTT   | 88bp          |
| p63 Reverse      | GAGGAGCCGTTCTGAATCTG   |               |
| CK5 Forward      | GAGATCGCCACCTACAGGAA   | 117bp         |
| CK5 Reverse      | TCCTCCGTAGCCAGAAGAGA   |               |
| CK8 Forward      | GACATCGAGATCACCACCTA   | 125bp         |
| CK8 Reverse      | GATGAACTCAGTCCTCTGA    |               |
| CDK2 Forward     | CTCATCAAGAGCTATCTGTTCC | 105bp         |
| CDK2 Reverse     | TGCATTGATAAGCAGGTTCT   |               |
| CDK4 Forward     | GCAGTCTACATACGCAACA    | 139bp         |
| CDK4 Reverse     | AGGCAATCCAATGAGATCAA   |               |
| CDK6 Forward     | GACTTGACCACTTACTTGGATA | 118bp         |
| CDK6 Reverse     | GCACTACTCTGTGAGAATGAA  |               |
| CyclinA2 Forward | GTCCTTGCTTTTGA CTGGC   | 139bp         |
| CyclinA2 Reverse | ACGGGTCAGCATCTATCAAAC  |               |
| CyclinB1 Forward | AGCGAAGAGCTACAGGCAAG   | 113bp         |
| CyclinB1 Reverse | TCACACACAGGCACCTTCTC   |               |
| CyclinD1 Forward | GCCCTCCGTATCTTACTTCAAG | 145bp         |

|                  |                        |       |
|------------------|------------------------|-------|
| CyclinD1 Reverse | GCGGTCCAGGTAGTTCATG    |       |
| p15 Forward      | CTTTGTGTACCGCTGGGAAC   | 104bp |
| p15 Reverse      | TTAGCTCTGCTCTTGGGATTG  |       |
| p16 Forward      | GTGTGCATGACGTGCGGG     | 146bp |
| p16 Reverse      | GCAGTTCGAATCTGCACCGTAG |       |
| p19 Forward      | GCTCTGGCTTTCGTGAACATG  | 137bp |
| p19 Reverse      | TCGAATCTGCACCGTAGTTGAG |       |
| p21 Forward      | TTGCACTCTGGTGTCTGAGC   | 112bp |
| p21 Reverse      | TCTGCGCTTGGAGTGATAGA   |       |
| p27 Forward      | GTGGACCAAATGCCTGACTC   | 122bp |
| p27 Reverse      | TCTGTTCTGTTGGCCCTTTT   |       |
| TGFβR1 Forward   | TAGCAGCAGACAACAAAGAC   | 115bp |
| TGFβR1 Reverse   | CCTTCCACAGTAACAGTGTATC |       |
| TGFβR2 Forward   | CCAAGTCGGATGTGGAAATGG  | 103bp |
| TGFβR2 Reverse   | GCCATGACATCACTGTTAAA   |       |
| TGFβR3 Forward   | GGGAGGTTACATCCTAAAC    | 81bp  |
| TGFβR3 Reverse   | GGTTCAGATGCAGGGTAAC    |       |
| TGFβ1 Forward    | GAAGCGGACTACTATGCTAAA  | 94bp  |
| TGFβ1 Reverse    | TACTGTGTGAGATGTCTTTGG  |       |
| TGFβ2 Forward    | GAGGGATCTTGGATGGAAATG  | 112bp |
| TGFβ2 Reverse    | GAGGACTTTGGTGTGTTGAG   |       |
| TGFβ3 forward    | GCATCCACTGTCCATGTCAC   | 109bp |
| TGFβ3 Reverse    | CCATGGTCATCTTCATTGTCC  |       |
| Id1 Forward      | AGAACCGCAAAGTGAGCAAG   | 66bp  |
| Id1 Reverse      | GCTGCAGGTCCCTGATGTAG   |       |
| Id2 Forward      | GCAAAGTACTCTGTGGCTAAA  | 131bp |
| Id2 Reverse      | CCTGGTGAAATGGCTGATAA   |       |
| Id3 Forward      | CTGCTACGAGGCGGTGTG     | 175bp |
| Id3 Reverse      | CACCTGGCTAAGCTGAGTGC   |       |
| Coll1a1 Forward  | GCCAAGAAGACATCCCTGAAG  | 104bp |
| Coll1a1 Reverse  | ATTGTGGCAGATACAGATCAA  |       |
| ZFP36L1 Forward  | GGGTAACAAGATGCTCAACTA  | 140bp |
| ZFP36L1 Reverse  | GGTTCTGATGGAAGTTGGAGC  |       |
| 4E-BP1 Forward   | GGTCACTAGCCCTACCAG     | 112bp |
| 4E-BP1 Reverse   | GTCCATCTCAAATTGTGACTCT |       |
| E2F1 Forward     | CAACTGCTTTCGGAGGACT    | 149bp |
| E2F1 Reverse     | GTCTCTGAAGAATCCACAGCTT |       |

**Table SIV**

Antibodies for Immunohistochemistry and Western Blot

| Antibody          | Company, Catalog Number | Usage, Dilution         |
|-------------------|-------------------------|-------------------------|
| CK5               | Covance #PRB-160P       | IHC: 1:1000             |
| CK8               | Covance #MMS-162P       | IHC: 1:2000, WB: 1:1000 |
| p63               | Santa Cruz, 4A4         | IHC: 1:100, WB: 1:1000  |
| RFP               | Rockland, #600-401-379  | IHC: 1:1000             |
| Ki67              | Novus, #NB500-170       | IHC: 1:100              |
| Cleaved Caspase 3 | Cell Signaling, #9661   | IHC: 1:500              |

*Heparan sulfate regulates prostate stem cell function*

|            |                       |                 |
|------------|-----------------------|-----------------|
| pSmad3     | NBP1-77836SS          | WB: 1:1000      |
| pSmad2     | CST, #3104            | ICC: 1:200      |
| Smad2      | CST, #3122            | ICC: 1:200      |
| GAPDH      | Cell Signaling, #2118 | WB: 1:5000      |
| Actin      | Sigma-Aldrich, A2228  | WB: 1:1,000,000 |
| Syndecan-1 | Santa Cruz, H-174     | WB: 1:1,000     |
| pSmad1     | Cell Signaling, #9511 | WB: 1:1,000     |
